# Supplementary material for: Acoustic omni meta-atom for decoupled access to all octants of a wave parameter space
Source: PubMed Central journal article supplement (PMC5056457; doi:10.1038/ncomms13012), 2016-09-30
Supplement: ncomms13012-s1.pdf [file ncomms13012-s1.pdf]

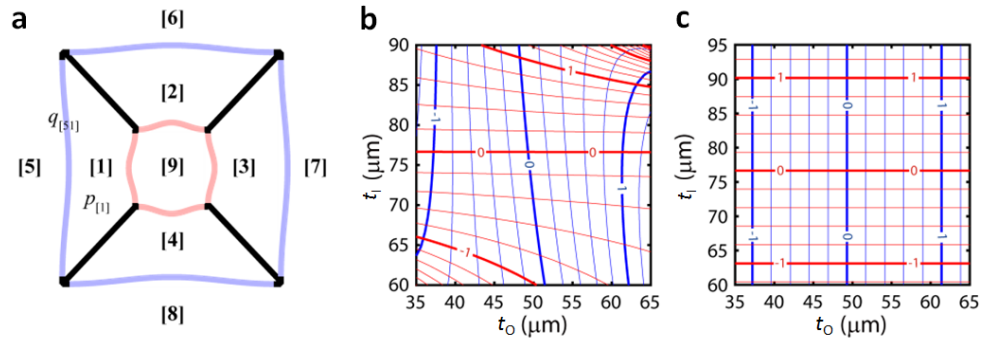

**Supplementary Figure 1 | Schematics of the meta-atom and decoupled control of wave parameters.** **a**, Assignment of average pressure  $p_{[i]}$  and displacement  $q_{[jk]}$  for the membranes and sub-cells. **b,c**, Mapping of  $(\rho, B^{-1})$  with the control of  $(t_o, t_l)$  using **b**, the full solutions in (14) and **c**, their approximations (15) (right) at 1,300 Hz.

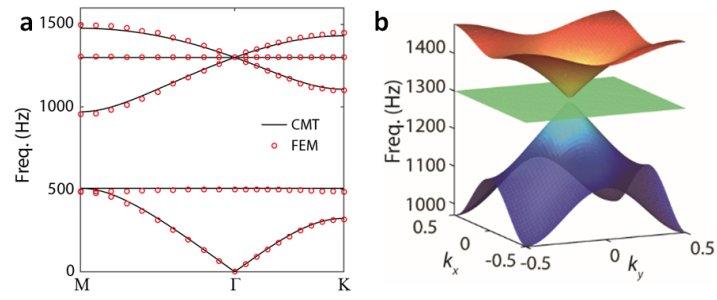

**Supplementary Figure 2 | Band structures of the meta-atom. a**, 2D band diagram (CMT and FEM) and **b**, 3D plot of Dirac cone (CMT) near the operation frequency at 1,300 Hz.

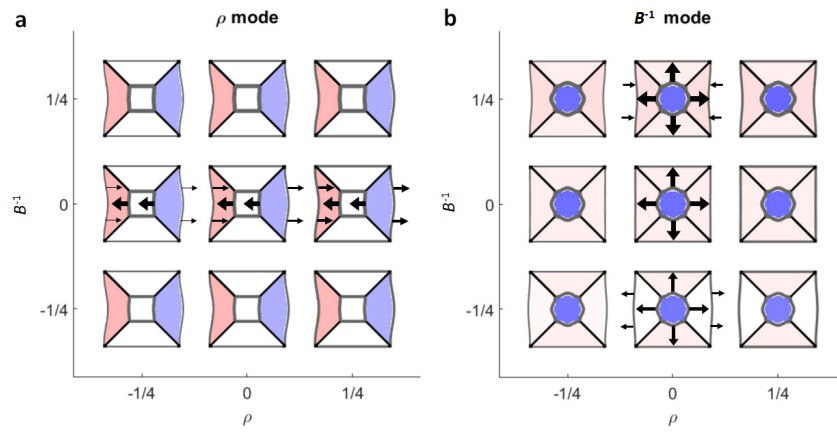

**Supplementary Figure 3 | Characteristic motions of the meta-atom for a,  $\rho$ -dipolar and b,  $B^{-1}$ -monopolar modes. Displacement (gray lines) and momentum (black arrows) of the membranes. Also shown are the pressure field patterns (+: red, -: blue) at 1,300 Hz.**

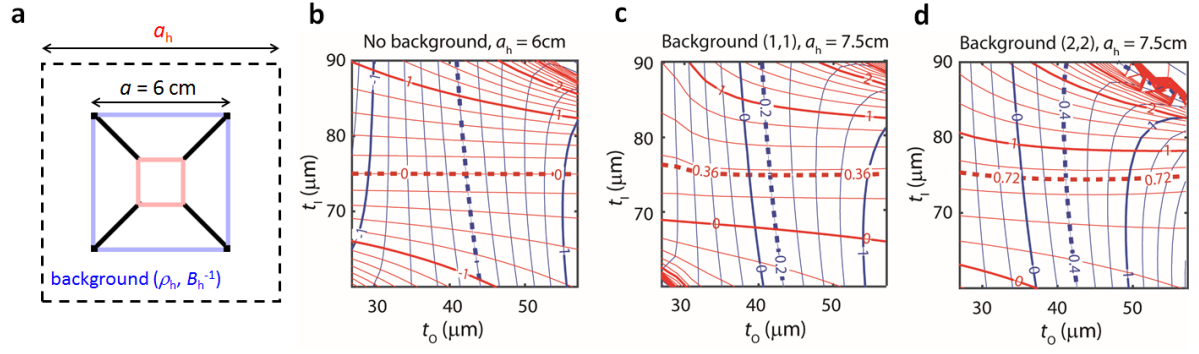

**Supplementary Figure 4 | Shifting the center of decoupling operation away from the Dirac point.** **a**, Schematics of the meta-atom in the background host medium. FEM obtained  $(\rho, B^{-1})$  tuning map at 1,300 Hz are shown in **b**,  $(\rho_c, B_c^{-1}) = (0,0)$  without host ( $a_h = a$ ) medium. **c**,  $(\rho_c, B_c^{-1}) = (0.2, 0.36)$  with  $(\rho_h, B_h^{-1}) = (1, 1)$ . **d**,  $(\rho_c, B_c^{-1}) = (0.4, 0.72)$  with  $(\rho_h, B_h^{-1}) = (2, 2)$ .  $a_h = 6\text{cm}$ ,  $7.5\text{cm}$  and  $7.5\text{cm}$  for **b**, **c**, and **d** respectively.

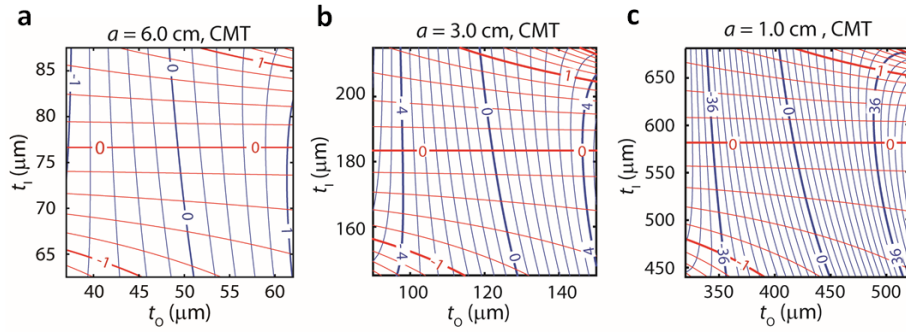

**Supplementary Figure 5 | Extension of  $\rho$  tuning range.** CMT calculated ( $\rho$ ,  $B^{-1}$ ) tuning maps at 1,300 Hz for different lattice constant, **a**,  $a = 6$  cm, **b**,  $a = 3$  cm and **c**,  $a = 1$  cm. Grid spacings for  $B^{-1}$  (red lines) are fixed to 0.2, and for  $\rho$  (blue lines) are 0.2, 0.5 and 3, respectively.

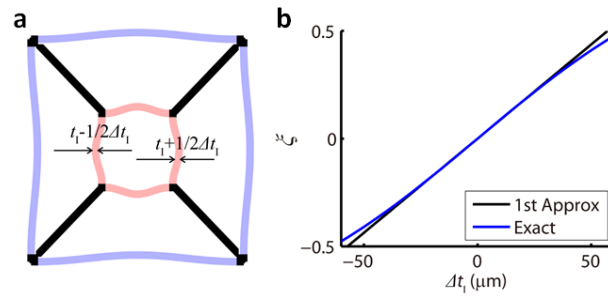

**Supplementary Figure 6 | Implementation of bianisotropy and CMT obtained  $\xi$  values. a,** Schematics of the asymmetric meta-atom for non-zero bianisotropy  $\xi$  with  $\Delta t_1 \neq 0$ . **b,** Comparison of exact (16) and approximated (17) solution of  $\xi$ , as a function of  $\Delta t_1$ .  $\rho = B^{-1} = 0, 1, 300$  Hz.

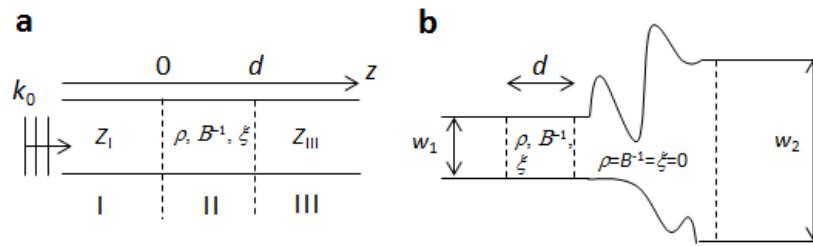

**Supplementary Figure 7 | Schematics of the asymmetric transmission between a, different impedances or b, waveguides widths, using matched zero index and bianisotropic metamaterials.**

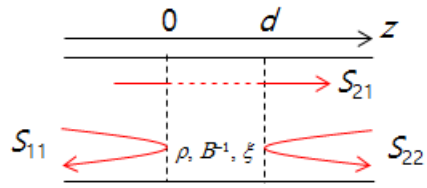

**Supplementary Figure 8 | Schematics of the S parameters in the bianisotropic medium for determining effective wave parameters.**



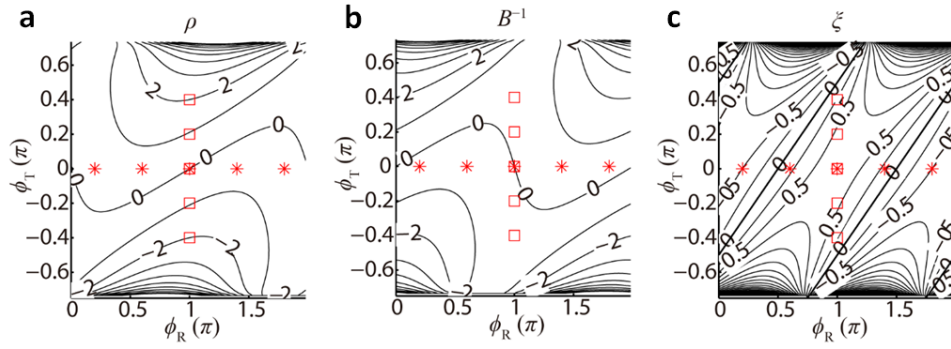

**Supplementary Figure 9 | Wave parameter value maps in the  $(\phi_R, \phi_T)$  coordinate, subject to the constraint of 50:50 power divisions for transmission and reflection.** Required **a**, density  $\rho$  and **b**, modulus  $B^{-1}$ , and **c**, bianisotropy  $\xi$  are plotted. Required phase shifts  $(\phi_R, \phi_T)$  for individual meta-atoms in the  $40 \times 1$  meta-atom array, achieving extra-ordinary transmission and reflections are marked with red square ( $\Delta\phi_T(x) \neq 0$ ) and red star ( $\Delta\phi_R(x) \neq 0$ ), respectively ( $a = 6$  cm,  $\lambda = 26.4$  cm, and  $f = 1,300$  Hz).

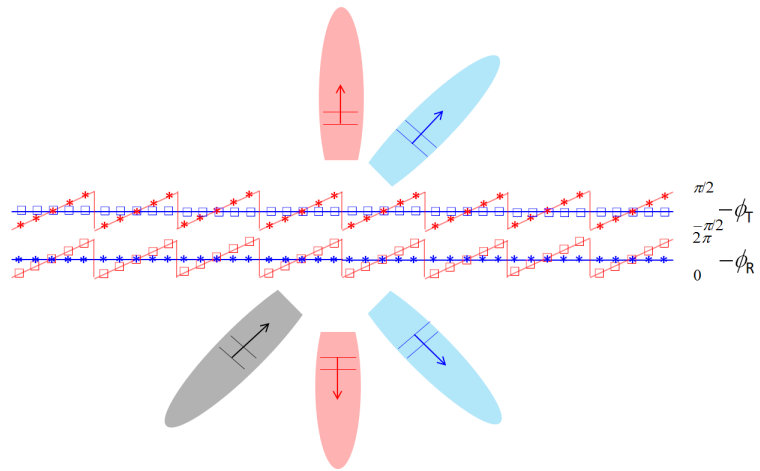

**Supplementary Figure 10 | Required phase shifts ( $\phi_R$ ,  $\phi_T$ ) for individual meta-atoms in a single sheet of a  $40 \times 1$  array to achieve ordinary (blue marks) or extra-ordinary (red marks) transmission and reflection.**

## Supplementary Note 1. Derivation of effective macroscopic acoustic parameters from the homogenization theory

To derive equation (1) in manuscript, we start from the microscopic acoustic wave equations<sup>1</sup> based on Newton's law and Hooke's law<sup>2</sup>. Assuming  $\exp(i\omega t)$  time dependency of angular frequency  $\omega$ ,

$$\begin{aligned}\nabla p(\mathbf{r}) &= -i\omega\boldsymbol{\pi}(\mathbf{r}) = -i\omega\rho_0\mathbf{v}(\mathbf{r}) - i\omega\rho_0(\rho_s - 1)\mathbf{v}(\mathbf{r}) \\ \nabla \cdot \mathbf{v}(\mathbf{r}) &= -i\omega e(\mathbf{r}) = -i\omega B_0^{-1}p(\mathbf{r}) - i\omega B_0^{-1}(B_s^{-1} - 1)p(\mathbf{r})\end{aligned}\quad (1)$$

where  $p(\mathbf{r})$ ,  $\mathbf{v}(\mathbf{r})$ ,  $e(\mathbf{r}) = B_0^{-1}B_s^{-1}p(\mathbf{r})$ ,  $\boldsymbol{\pi}(\mathbf{r}) = \rho_0\rho_s\mathbf{v}(\mathbf{r})$  denote the pressure, velocity, strain and momentum density field at  $\mathbf{r}$ , respectively.  $\rho_0$  and  $B_0$  are the density and bulk modulus of the *air* '0';  $\rho_s$  and  $B_s$  are the density and bulk modulus (normalized to the air) of the constituting materials in the unit cell.

By following a similar procedure used in Alu<sup>3</sup> (homogenization theory for electromagnetic waves), we now derive the acoustic equations for the macroscopic fields  $(\bar{p}, \bar{\mathbf{v}})$  from (1). Noting that the effective parameters are independent of the origin of the coordinate<sup>4,5</sup> in case of periodic system or finite metamaterial terminated at the same location of the unit cell, we use Floquet theory with  $\exp(-i\boldsymbol{\beta} \cdot \mathbf{r})$  dependence. Averaging the field of  $p$  and  $\mathbf{v}$  over the two-dimensional square lattice (lattice constant  $a$ , unit cell domain  $S$ , effective wavevector  $\boldsymbol{\beta}$ ), equation (1) then becomes

$$\begin{aligned}-i\boldsymbol{\beta}\bar{p} &= -i\omega\rho_0\bar{\mathbf{v}} - \frac{i\omega\rho_0}{a^2} \int_S (\rho_s - 1)\mathbf{v}(\mathbf{r})e^{i\boldsymbol{\beta} \cdot \mathbf{r}} dS \\ -i\boldsymbol{\beta} \cdot \bar{\mathbf{v}} &= -i\omega B_0^{-1}\bar{p} - \frac{i\omega B_0^{-1}}{a^2} \int_S (B_s^{-1} - 1)p(\mathbf{r})e^{i\boldsymbol{\beta} \cdot \mathbf{r}} dS\end{aligned}\quad (2)$$

where  $\bar{\mathbf{v}} = \frac{1}{a^2} \int_S \mathbf{v}(\mathbf{r})e^{i\boldsymbol{\beta} \cdot \mathbf{r}} dS$ , and  $\bar{p} = \frac{1}{a^2} \int_S p(\mathbf{r})e^{i\boldsymbol{\beta} \cdot \mathbf{r}} dS$ .

Now, using Taylor's expansion in the long wavelength limit ( $a \ll 2\pi/|\boldsymbol{\beta}|$ ),

$$\begin{aligned}\int_S (\rho_s - 1)\mathbf{v}(\mathbf{r})e^{i\boldsymbol{\beta} \cdot \mathbf{r}} dS &= \int_S (\rho_s - 1)\mathbf{v}(\mathbf{r})dS - i\boldsymbol{\beta} \times \int_S \frac{\mathbf{r} \times (\rho_s - 1)\mathbf{v}(\mathbf{r})}{2} dS + \dots, \\ \int_S (B_s^{-1} - 1)p(\mathbf{r})e^{i\boldsymbol{\beta} \cdot \mathbf{r}} dS &= \int_S (B_s^{-1} - 1)p(\mathbf{r})dS - i\boldsymbol{\beta} \cdot \int_S \frac{\mathbf{r}(B_s^{-1} - 1)p(\mathbf{r})}{2} dS + \dots\end{aligned}\quad (3)$$

(2) is rewritten as

$$\begin{aligned}
-i\boldsymbol{\beta}[\bar{p} - \frac{i\omega}{2a^2} \int_S \mathbf{r} \cdot (\rho_{sr} - 1)\mathbf{v}(\mathbf{r})dS] &= -i\omega\rho_0[\bar{v} + \frac{1}{a^2} \int_S (\rho_s - 1)\mathbf{v}(\mathbf{r})dS] \\
-i\boldsymbol{\beta} \cdot [\bar{v} - \frac{i\omega}{2a^2} \int_S \mathbf{r}(B_s^{-1} - 1)p(\mathbf{r})dS] &= -i\omega B_0^{-1}[\bar{p} + \frac{1}{a^2} \int_S (B_s^{-1} - 1)p(\mathbf{r})dS],
\end{aligned} \tag{4}$$

where  $\rho_{sn}$  is  $\rho_s$  in the  $n$  ( $r$  or  $x$ ) direction. Comparing the microscopic (1) and macroscopic (4) equations, we obtain the averaged fields  $p_{av}$ ,  $\boldsymbol{\pi}_{av}$ ,  $\mathbf{v}_{av}$ , and  $e_{av}$  as

$$\begin{aligned}
p_{av} &= \bar{p} - \frac{i\omega}{2a^2} \int_S \mathbf{r} \cdot (\rho_{sr} - 1)\mathbf{v}(\mathbf{r})dS, & \boldsymbol{\pi}_{av} &= \rho_0[\bar{v} + \frac{1}{a^2} \int_S (\rho_s - 1)\mathbf{v}(\mathbf{r})dS] \\
\mathbf{v}_{av} &= \bar{v} - \frac{i\omega}{2a^2} \int_S \mathbf{r}(B_s^{-1} - 1)p(\mathbf{r})dS, & e_{av} &= B_0^{-1}[\bar{p} + \frac{1}{a^2} \int_S (B_s^{-1} - 1)p(\mathbf{r})dS],
\end{aligned} \tag{5}$$

which make the macroscopic acoustic equations (4) to take the usual forms of  $-i\boldsymbol{\beta}p_{av} = -i\omega \boldsymbol{\pi}_{av}$ , and  $-i\boldsymbol{\beta} \cdot \mathbf{v}_{av} = -i\omega e_{av}$ . Under good approximations of  $\bar{v}_x \sim \frac{1}{a^2} \int_S v_x dS$  and  $\bar{p} \sim \frac{1}{a^2} \int_S p dS$ , we finally obtain the effective parameters of  $\rho_x$  and  $B^{-1}$ :

$$\begin{aligned}
\rho_x &= \frac{\boldsymbol{\pi}_{av,x}}{\rho_0 v_{av,x}} = \frac{\bar{v}_x + \frac{1}{a^2} \int_S (\rho_{sx} - 1)v_x dS}{\bar{v}_x - \frac{i\omega}{2a^2} \int_S (B_s^{-1} - 1)px dS} \sim \frac{\int_S \rho_{sx} v_x dS}{\int_S v_x dS - \frac{i\omega}{2} \int_S (B_s^{-1} - 1)px dS}, \text{ and} \\
B^{-1} &= \frac{e_{av}}{B_0^{-1} p_{av}} = \frac{\bar{p} + \frac{1}{a^2} \int_S (B_s^{-1} - 1)p dS}{\bar{p} + \frac{i\omega}{2a^2} \int_S r(\rho_{sr} - 1)v_r dS} \sim \frac{\int_S B_s^{-1} p dS}{\int_S p dS + \frac{i\omega}{2} \int_S r(\rho_{sr} - 1)v_r dS}.
\end{aligned} \tag{6}$$

## Supplementary Note 2. Decoupling of the effective macroscopic acoustic parameters near the Dirac point

Near the Dirac point, the decoupling of  $\rho_x$  and  $B^{-1}$  can be achieved using a meta-atom having an inner sub-cell with radial symmetry and outer sub-cells supporting linear vibrations, constructed with a membrane, air, and solid walls (Fig. 1b in manuscript). Considering that the area (thickness) and compressibility of the membrane is much less than that of air such that  $s_m \ll s_0$ ,  $B_{sm}^{-1} \ll B_{s0}^{-1} = 1$ , and noting that the mass of the membrane is much larger than that of air such that  $\rho_{sm}s_m \gg \rho_{s0}s_0$ , we achieve,

$$\rho_x \sim \frac{\int_{Sm} \rho_{mx} v_x dS}{\int_{s_0} v_x dS + \frac{i\omega}{2} \int_{Sm} p x dS} = \frac{\int_{ISm} \rho_{mx} v_x dS + \int_{OSm} \rho_{mx} v_x dS}{\int_{IS0} v_x dS + \int_{OS0} v_x dS + \frac{i\omega}{2} \int_{Sm} p x dS} \quad (7)$$

$$B^{-1} \sim \frac{\int_{s_0} B_{s_0}^{-1} p dS}{\int_{s_0} p dS + \frac{i\omega}{2} \int_{Sm} r \rho_{mr} v_r dS} = \frac{\int_{s_0} B_{s_0}^{-1} p dS}{\int_{s_0} B_{s_0}^{-1} p dS + \frac{i\omega}{2} \left( \int_{ISm} r \rho_{mr} v_r dS + \int_{OSm} r \rho_{mr} v_r dS \right)}$$

where  $ISm(0)$  and  $OSm(0)$  refer to the integration region of the inner sub-cell and the outer sub-cell at the membrane (air), respectively. Now, near  $B^{-1} \sim 0$  with zero effective compressibility,  $\int_{OSm} (r \rho_{mr} v_r) dS \sim 0$  because the radial movement of the outer membrane is impossible, and because the first term in the denominator vanishes from  $\int_{s_0} p dS = B_{s_0}^{-1} \int p dS \sim 0$  (with  $B_{s_0}^{-1} = 1$ , and  $B^{-1} \sim 0$  while  $B^{-1}$  proportional to  $\int B_{s_0}^{-1} p dS$ ), we obtain

$$B^{-1} = \frac{\int_{s_0} B_{s_0}^{-1} p dS}{\frac{i\omega}{2} \int_{ISm} r \rho_{mr} v_r dS} \quad (8)$$

Similarly, near  $\rho_x \sim 0$ , the outer- and inner- membrane should move out of phase but need to maintain the same momentum value. To control  $\rho$  with the outer cells we impose  $\int_{IS0} v_x dS \sim 0$ , which can be achieved with a large  $\rho_m$  in the inner membrane because  $\rho_x \sim \int_{ISm} \rho_{mx} v_x dS + \int_{OSm} \rho_{mx} v_x dS \sim 0$ . Additionally, for the membrane,  $s_m \ll s_0$  thus  $\int_{Sm} p x dS \ll \int_{OS0} v_x dS$ ; thus,

$$\rho_x = \frac{\int_{ISm} \rho_{mx} v_x dS + \int_{OSm} \rho_{mx} v_x dS}{\int_{OS0} v_x dS} \quad (9)$$

### Supplementary Note 3. Coupled mode theory derivation of $(\rho, B^{-1})$ for a meta-atom having a sub-cell design

For a specific geometry of Fig. 1b in the manuscript, a more rigorous solution for  $(\rho, B^{-1})$  can be obtained by solving the coupled mode equation. Assuming an average displacement  $q_{[j|k]}$  (i.e., membrane displacement directing from  $j$  to  $k$ ) and pressure  $p_{[i]}$  (i.e., pressure in the sub-cell room of  $i$ ) as in Supplementary Fig. 1a, we separately apply Newton's law to the membranes and Hooke's

law to the sub-cells to obtain the relation between  $p_{[i]}$  and  $q_{[jk]}$ . Assuming Floquet's boundary conditions with an acoustic refractive index of  $(n_x, n_y)$ , the coupling equations are then expressed as

$$\begin{aligned}
B_0^{-1}ap_{[i]}s_{[i]} &= \sum_k b_{[ik]}q_{[ik]} - \sum_j b_{[ji]}q_{[ji]}, & -\rho_{Al}t_{[jk]}\omega^2q_{[jk]} &= (p_{[k]} - p_{[j]}), \\
\frac{p_{[7]} + p_{[3]}}{p_{[5]} + p_{[1]}} &= \frac{q_{[37]}}{q_{[51]}} = \exp(-i\beta_0 n_x a), & \frac{p_{[2]} + p_{[6]}}{p_{[8]} + p_{[4]}} &= \frac{q_{[26]}}{q_{[84]}} = \exp(-i\beta_0 n_y a)
\end{aligned} \tag{10}$$

where  $b_{[jk]}$ ,  $t_{[jk]}$  and  $s_{[i]}$  are the width, thickness and area of the membrane  $[jk]$  and sub-cell  $[i]$ ; the  $B_0$ ,  $\beta_0$  are the air modulus and propagation constant,  $\rho_{Al}$  is the Aluminum density and  $a$  is the lattice constant.

To find the eigenmodes of the system, we rewrite (10) in the form of a linear system ( $\mathbf{Ax} = \mathbf{0}$ ), where  $\mathbf{A}$  is the 17 x 17 matrix, and  $\mathbf{x} = [\mathbf{p}, \mathbf{q}]$  is the vector consisting of  $p$ 's and  $q$ 's. Focusing on the  $x$  direction ( $n_x = n, n_y = 0$ ), (10) can be written as

$$\begin{pmatrix}
1 & 0 & 0 & 0 & 0 & 0 & 0 & 0 & 0 & C_o & 0 & 0 & 0 & -C_o & 0 & 0 & 0 \\
0 & 1 & 0 & 0 & 0 & 0 & 0 & 0 & 0 & 0 & -C_o & 0 & 0 & 0 & C_o & 0 & 0 \\
0 & 0 & 1 & 0 & 0 & 0 & 0 & 0 & 0 & 0 & 0 & -C_o & 0 & 0 & 0 & C_o & 0 \\
0 & 0 & 0 & 1 & 0 & 0 & 0 & 0 & 0 & 0 & 0 & 0 & C_o & 0 & 0 & 0 & -C_o \\
0 & 0 & 0 & 0 & 0 & 0 & 0 & 0 & 1 & -C_1 & C_1 & C_1 & -C_1 & 0 & 0 & 0 & 0 \\
1 & 0 & 0 & 0 & -1 & 0 & 0 & 0 & 0 & 0 & 0 & 0 & 0 & M_o & 0 & 0 & 0 \\
0 & 1 & 0 & 0 & 0 & -1 & 0 & 0 & 0 & 0 & 0 & 0 & 0 & 0 & -M_o & 0 & 0 \\
0 & 0 & 1 & 0 & 0 & 0 & -1 & 0 & 0 & 0 & 0 & 0 & 0 & 0 & 0 & -M_o & 0 \\
0 & 0 & 0 & 1 & 0 & 0 & 0 & -1 & 0 & 0 & 0 & 0 & 0 & 0 & 0 & 0 & M_o \\
1 & 0 & 0 & 0 & 0 & 0 & 0 & 0 & -1 & -M_1 & 0 & 0 & 0 & 0 & 0 & 0 & 0 \\
0 & 1 & 0 & 0 & 0 & 0 & 0 & 0 & -1 & 0 & M_1 & 0 & 0 & 0 & 0 & 0 & 0 \\
0 & 0 & 1 & 0 & 0 & 0 & 0 & 0 & -1 & 0 & 0 & M_1 & 0 & 0 & 0 & 0 & 0 \\
0 & 0 & 0 & 1 & 0 & 0 & 0 & 0 & -1 & 0 & 0 & 0 & -M_1 & 0 & 0 & 0 & 0 \\
0 & 0 & 0 & 0 & 0 & 0 & 0 & 0 & 0 & 0 & 0 & 0 & 0 & e^{-i\beta_0 na} & 0 & -1 & 0 \\
e^{-i\beta_0 na} & 0 & 0 & 0 & 0 & 0 & 0 & 0 & 0 & 0 & 0 & 0 & 0 & 0 & 0 & 1 & 0 & -1 \\
0 & 1 & 0 & -1 & 0 & 1 & 0 & -1 & 0 & 0 & 0 & 0 & 0 & 0 & 0 & 0 & 0 & 0 \\
0 & 0 & 0 & 0 & 0 & 0 & 0 & 0 & 0 & 0 & 0 & 0 & 0 & 0 & 0 & 0 & 0 & 0
\end{pmatrix}
\begin{pmatrix}
p_{[1]} \\
p_{[2]} \\
p_{[3]} \\
p_{[4]} \\
p_{[5]} \\
p_{[6]} \\
p_{[7]} \\
p_{[8]} \\
p_{[9]} \\
q'_{[19]} \\
q'_{[92]} \\
q'_{[93]} \\
q'_{[49]} \\
q'_{[51]} \\
q'_{[26]} \\
q'_{[37]} \\
q'_{[84]}
\end{pmatrix}
= \begin{pmatrix}
0 \\
0 \\
0 \\
0 \\
0 \\
0 \\
0 \\
0 \\
0 \\
0 \\
0 \\
0 \\
0 \\
0 \\
0 \\
0 \\
0 \\
0
\end{pmatrix} \tag{11}$$

where  $C_1 = \frac{B_0 a}{s_1}$ ,  $C_o = \frac{B_0 a}{s_o}$ ,  $M_1 = -\frac{\omega^2 a}{a_{in}} [\rho_{Al} t_1 + \frac{\rho_0 s_o}{2a_{in}} + \frac{\rho_0 s_1}{4a_{in}}]$ ,  $M_o = -2\omega^2 [\rho_{Al} t_o + \frac{\rho_0 s_o}{2a}]$  and  $q'_n = \frac{b_n}{a_n} q_n$ .

It should be noted that the matrix  $\mathbf{A}$  in (11) consists of the coefficients from Hooke's law (row 1 to 5), Newton's law (row 6 to 13), and Floquet's boundaries (row 14 to 17).

To achieve a non-zero physical null space of  $\mathbf{x} = [\mathbf{p}, \mathbf{q}]$ ,  $\text{Det}(\mathbf{A})$  should vanish, leading to the analytical expression for effective  $n$ :

$$\exp(i\beta_0 na) = \frac{1}{2C_0^2 C_1} \{M_0(M_1 + C_0)(M_1 + C_0 + 4C_1) + 2C_0[M_1(M_1 + C_0) + C_1(4M_1 + C_0)] \pm \sqrt{[2M_1 C_0 + M_0(M_1 + C_0)][M_1 + C_0 + 4C_1][2M_1 C_0(M_1 + C_0) + 4C_0 C_1(2M_1 + C_0) + M_0(M_1 + C_0)(M_1 + C_0 + 4C_1)]}\}. \quad (12)$$

The effective impedance  $Z$  then also becomes

$$ZZ_0 = \frac{2i\omega q'_{[7]}}{p_{[7]} + p_{[3]}} = \pm \frac{2i\omega(M_1 + C_0)\sqrt{M_1 + C_0 + 4C_1}}{\sqrt{[2M_1 C_0 + M_0(M_1 + C_0)][2M_1 C_0(M_1 + C_0) + 4C_0 C_1(2M_1 + C_0) + M_0(M_1 + C_0)(M_1 + C_0 + 4C_1)]}}. \quad (13)$$

Using  $\rho = n/Z$  and  $B^{-1} = nZ$ , we finally obtain rigorous solutions for  $\rho$  and  $B$  in analytical forms.

Of critical importance is in solving the inverse problem, to find the design parameters of the membranes ( $M_0, M_1$ ) from the target wave parameters of  $n$  and  $Z$ . From (12) and (13), we obtain,

$$M_0 = -2C_0 \pm_1 \frac{2\omega[1 + \cos(\frac{\omega na}{c_0})]}{Z_0 Z \sin(\frac{\omega na}{c_0})} \pm_2 \frac{4C_1 \omega \sqrt{[1 \pm_1 \frac{C_0^2}{4C_1 \omega} Z_0 Z \sin(\frac{\omega na}{c_0})]}}{C_1 Z_0 Z \sin(\frac{\omega na}{c_0})} \quad (14)$$

$$M_1 = -C_0 - 2C_1 + (\pm_1 \cdot \pm_2) \frac{2C_1 \omega \sqrt{[1 \pm_1 \frac{C_0^2}{4C_1 \omega} Z_0 Z \sin(\frac{\omega na}{c_0})]}}{\omega}.$$

Simplifying (14) in the long wavelength limit [ $\exp(i\beta_0 na) \sim 1 + i\beta_0 na - 1/2(\beta_0 na)^2$ ] and by setting  $\pm_1 = +$  and  $\pm_2 = -$  for the condition of ( $\text{Im}[n] \geq 0, \text{Re}[Z] \geq 0$ ), for a first order approximation we achieve decoupled equations for  $M_0$  ( $\rho$ ) and  $M_1$  ( $B^{-1}$ ) that is equivalent to equation (3) in the manuscript:

$$-(t_0 \rho_{Al} + \frac{\rho_0 s_0}{2a}) \omega^2 = \frac{1}{2} M_0 \sim -C_0 + \frac{\omega[2 - \frac{1}{2}(\frac{\omega na}{c_0})^2]}{Z_0 Z \frac{\omega na}{c_0}} - \frac{2\omega[1 + \frac{C_0^2}{8C_1 \omega} Z_0 Z \frac{\omega na}{c_0}]}{Z_0 Z \frac{\omega na}{c_0}} = -C_0 - \frac{1}{2} \omega^2 a \rho \rho_0 - \frac{C_0^2}{4C_1} = -a(\frac{B_0}{s_0} + \frac{B_0 s_1}{4s_0^2} + \frac{1}{2} \omega^2 \rho \rho_0) \quad (15)$$

$$-(t_1 \rho_{Al} + \frac{\rho_0 s_0}{2a_{in}} + \frac{\rho_0 s_1}{4a_{in}}) \omega^2 a / a_{in} = M_1 \sim -C_0 - 2C_1 - 2C_1[1 + \frac{C_0^2}{8C_1} (\frac{Z_0 Z na}{c_0})] = -C_0 - 4C_1 - \frac{C_0^2 a B^{-1}}{4 B_0^{-1}} = -a(\frac{B_0}{s_0} + \frac{4B_0}{s_1} + (\frac{B_0 a^2 B^{-1}}{4s_0^2 B_0^{-1}})).$$

From the CMT (11), the dispersion relation  $\omega(k)$  also can be obtained. Replacing  $M_1$  and  $M_0$  with  $m_1 \omega^2$  and  $m_0 \omega^2$  respectively, the CMT now becomes the function of  $\omega$  and  $k$ . Directly solving  $\text{Det}[\mathbf{A}] = 0$  in terms of wavenumber  $\omega(k)$ , we obtain,

$$\begin{aligned}
\omega = 0, \pm i \frac{\sqrt{C_o}}{\sqrt{m_1}}, \pm \frac{\sqrt{-(m_1 + m_o)C_o}}{\sqrt{m_1}\sqrt{m_o}}, \\
\pm \sqrt{\left[-\frac{2C_o}{m_o} - \frac{2C_o}{m_1} - \frac{4C_1}{m_1} + \frac{2^{-1/3}}{m_o m_1} P + \frac{2^{1/3}}{m_1} \frac{Q}{P}\right] / 3}, \\
\pm \sqrt{\left[-\frac{2C_o}{m_o} - \frac{2C_o}{m_1} - \frac{4C_1}{m_1} + \frac{2^{-1/3}}{m_o m_1} \left(\frac{-1 - \sqrt{3}i}{2}\right) P + \frac{2^{1/3}}{m_1} \left(\frac{-1 + \sqrt{3}i}{2}\right) \frac{Q}{P}\right] / 3}, \\
\pm \sqrt{\left[-\frac{2C_o}{m_o} - \frac{2C_o}{m_1} - \frac{4C_1}{m_1} + \frac{2^{-1/3}}{m_o m_1} \left(\frac{-1 + \sqrt{3}i}{2}\right) P + \frac{2^{1/3}}{m_1} \left(\frac{-1 - \sqrt{3}i}{2}\right) \frac{Q}{P}\right] / 3} \\
\left. \begin{aligned}
\text{where} \quad & \left( \begin{aligned}
\Pi = 2(m_o^3 + 3m_o^2 m_1 - 6m_o m_1^2 - 8m_1^3)C_o^3 + 12(m_o^3 - m_o^2 m_1 + 4m_o m_1^2)C_o^2 C_1 \\
& + 54m_o^2 m_1 [\cosh(k_x a) + \cosh(k_y a)]C_o^2 C_1 + 48(-m_o^3 + 2m_o^2 m_1)C_o C_1^2 - 128m_o^3 C_1^3 \\
P = & \left[ \Pi + \sqrt{\Pi^2 - 4[(m_o^2 + 2m_o m_1 + 4m_1^2)C_o^2 + 4(m_o^2 - 2m_o m_1)C_o C_1 + 16m_o^2 C_1^2]} \right]^{1/3} \\
Q = & (m_o + 2m_1 + 4m_1^2 / m_o)C_o^2 + 4(m_o - 2m_1)C_o C_1 + 16m_o C_1^2
\end{aligned} \right) \quad (16)
\end{aligned} \right)
\end{aligned}$$

Excluding negative valued and trivial solutions, we get solutions corresponding to 5 lowest bands; two flat bands and three dispersive bands (Supplementary Fig. 2a). Focusing on the Dirac point<sup>6,7</sup>  $(\rho, B^{-1}) = (0,0)$ , we plot band diagram near 1,300Hz as shown in Supplementary Fig. 2b; exhibiting the Dirac cone and a third flat band (corresponding to the acoustic transverse mode<sup>6</sup>) providing a triple degeneracy at  $k = 0$ .

#### Supplementary Note 4. Characteristic motions of dipolar ( $\rho$ ) and monopolar ( $B^{-1}$ ) eigenmodes at the Dirac point

Combining the eigensolution sets of  $\mathbf{v}$  and  $p$  that were calculated in Supplementary Note 3 meanwhile considering the excitation directions, it is possible to extract the dipolar- $\rho$  (linear vibrations) and monopolar- $B^{-1}$  (radial vibrations) modes, of the proposed structure. In Supplementary Fig. 3, we plot the CMT-calculated eigenmode patterns and displacement of membranes (gray lines) near the Dirac point, which clearly shows negligible vibrations of the inner membranes for the  $\rho$  - dipolar mode and negligible vibrations of the outer membrane for the  $B^{-1}$  - monopolar mode. Black arrows indicate the momentum of the individual membranes. These results confirm the proposed ansatzs and discussions regarding Eq. (2) in the manuscript.



## Supplementary Note 5. Decoupled operation away from the Dirac point and Extension of the tuning range

To shift the center of decoupling operation away from the Dirac point  $(\rho, B^{-1}) = (0, 0)$ , we place the meta-atom in the host medium of  $(\rho_h, B_h^{-1})$  (Supplementary Fig. 4a). In the frame of the effective medium theory, the shifted center of decoupling operation is calculated from  $(\rho_c, B_c^{-1}) = (\rho_h(1-a/a_h), B_h^{-1}(1-a^2/a_h^2))$ , well agreeing with the FEM results (Supplementary Fig. 4b-d). For example, with air  $(\rho_h, B_h^{-1}) = (1, 1)$  and  $a_h = 7.5\text{cm}$ , it was possible to shift the decoupled operation point to  $(\rho_c, B_c^{-1}) = (0.2, 0.36)$ ; mixing with  $(\rho_h, B_h^{-1}) = (2, 2)$  we also get  $(0.4, 0.72)$ .

For the extension of effective parameters' tuning ranges, we first focus on the extension of  $\rho$ , with Eq. (3) in the manuscript and (15). With  $\rho \sim \rho_{\text{AITO}}/a$  and  $B^{-1} \sim \rho_{\text{AITI}}a$  (as  $s_0 \sim a^2$ ), the tuning range of  $\rho$  is extended (while keeping  $B^{-1}$  at same value) by increasing  $t_0$  and  $t_1$ , and using smaller unit cell  $a$ . For example, we get  $\rho = -36 \sim 36$  and  $B^{-1} = -1 \sim 1$  with  $a = 1.0\text{cm}$  & thicker  $t_0$  and  $t_1$  (Supplementary Fig. 5), as intuitively expected for the smaller and heavier meta-atom. The same equation (3) in the manuscript and (15) can be used to change the tuning range of  $B^{-1}$ . Nonetheless, it is noted that the tuning range of  $B^{-1} = -1 \sim 1$  is already not small, because  $B^{-1}$  is normalized to Air ( $B_{\text{Air}}^{-1} : B_{\text{Solid or Liquid}}^{-1} = 10^4 \sim 10^6 : 1$ )<sup>8</sup>.

## Supplementary Note 6. Coupled mode theory derivation of bianisotropy $\xi$ for a meta-atom having a asymmetric sub-cell design

Decoupled control over the bianisotropy  $\xi$ <sup>9-11</sup> of the acoustic meta-atom also can be achieved with the asymmetric assignment of the inner membrane thickness (non-zero  $\Delta t_1 = t_{\text{I-Right}} - t_{\text{I-Left}}$ ), as shown in Supplementary Fig. 6. The analytical formula for  $\xi$  is obtained by solving the coupled mode equations using a similar process to that described in Supplementary Note 3. Solving for  $Z_+$  and  $Z_-$  for  $+x$  and  $-x$  propagating waves, respectively,  $\xi = in(Z_+ - Z_-)/(Z_+ + Z_-)$  becomes

$$\xi \sim -2 \frac{c_0 C_o^2}{a\omega} (M_1 + C_o + 2C_1) \Delta M \frac{1}{F} \log\left(\frac{1}{(2C_o^2(M_1 + C_o)C_1)(G - F)}\right) \quad (17)$$

$$\text{where } \begin{cases} F = \sqrt{(M_1 + C_0)(H - K + 2C_1(2H - K + 2C_1(2H - K)))} \\ G = (M_1 + C_0)(H - K) + 2C_1(2H - K + 2M_1C_0 + C_0^2) \\ H = (M_1 + C_0)(2M_1C_0 + M_0(M_1 + C_0)) \\ K = (M_0 + 2C_0)\Delta M^2 \end{cases} \text{ and } \Delta M = -\frac{a\omega^2\rho_{\text{Al}}}{a_{\text{in}}}\Delta t_1.$$

In a good approximation to the first order  $\Delta t_1$  near the Dirac point ( $\rho = B^{-1} = 0$ ), the bianisotropy  $\xi$  of the meta-atom is solely determined by the structural asymmetry  $\Delta t_1$ , as shown below, which is independent (completely decoupled) from  $t_1$  or  $t_0$ :

$$\begin{aligned} \xi &= \frac{4c_0C_1}{a\omega\sqrt{\Delta M^2 + 16C_1^2}} \log\left(1 + \frac{\Delta M^2}{8C_1^2} + \frac{\Delta M\sqrt{\Delta M^2 + 16C_1^2}}{C_1^2}\right) \\ &\sim \frac{c_0}{2aC_1\omega}\Delta M = -\frac{c_0S_1\omega\rho_{\text{Al}}}{B_02aa_{\text{in}}}\Delta t_1. \end{aligned} \quad (18)$$

### Supplementary Note 7. Condition of complete tunneling between asymmetric impedance waveguides with bianisotropic meta-waveguide

In this section, we consider the problem of perfect tunneling between two different impedance waveguides (region I and region III,  $Z_I \neq Z_{\text{III}}$ ), with the introduction of bianisotropic media ( $\rho, B^{-1}, \xi$ ) in their interface (region II, Supplementary Fig. 7, left). Assuming the incident wave from the left, we convert the well-known electromagnetic wave equations of bianisotropy<sup>9</sup> into the acoustic wave equations; by replacing  $E$  and  $H$  with  $v$  and  $p$ , and applying the boundary conditions we get,

$$\begin{cases} v_{\text{II}} = v_{\text{II}+}e^{-ik_0nx} + v_{\text{II}-}e^{ik_0nx} \\ p_{\text{II}} = \frac{v_{\text{II}+}}{Z_+}e^{-ik_0nx} - \frac{v_{\text{II}-}}{Z_-}e^{ik_0nx}, \end{cases} \quad v_{\text{II}}(0) = 1 + R, v_{\text{II}}(d) = \sqrt{\frac{Z_{\text{III}}}{Z_I}}T, p_{\text{II}}(0) = \frac{1-R}{Z_I}, p_{\text{II}}(d) = \sqrt{\frac{1}{Z_I Z_{\text{III}}}}T \quad (19)$$

where  $n$  is the refractive index;  $Z_+$  and  $Z_-$  are the impedances for the + and - directions ( $Z_+ \neq Z_-$  when  $\xi \neq 0$ ), respectively;  $R$  and  $T$  denote the reflection and transmission coefficients across region II. To achieve 100% transmittance with zero phase shift, we impose  $R = 0$  and  $T = 1$  to obtain

$$\left( \begin{array}{l} v_{\text{II}+} + v_{\text{II}-} = 1 \\ v_{\text{II}+} e^{-ik_0 nd} + v_{\text{II}-} e^{ik_0 nd} = \sqrt{\frac{Z_{\text{III}}}{Z_1}} \\ \frac{v_{\text{II}+}}{Z_+} - \frac{v_{\text{II}-}}{Z_-} = \frac{1}{Z_1} \\ \frac{v_{\text{II}+}}{Z_+} e^{-ik_0 nd} - \frac{v_{\text{II}-}}{Z_-} e^{ik_0 nd} = \sqrt{\frac{1}{Z_1 Z_{\text{III}}}} \end{array} \right. \quad (20)$$

Eliminating  $v_{\text{II}+}$  and  $v_{\text{II}-}$  in (20), we get

$$\left( \begin{array}{l} \frac{Z_+(Z_1 + Z_-)}{Z_1(Z_+ + Z_-)} e^{-ik_0 nd} + \frac{Z_-(Z_1 - Z_+)}{Z_1(Z_+ + Z_-)} e^{ik_0 nd} = \sqrt{\frac{Z_{\text{III}}}{Z_1}} \\ \frac{Z_1 + Z_-}{Z_1(Z_+ + Z_-)} e^{-ik_0 nd} - \frac{Z_1 - Z_+}{Z_1(Z_+ + Z_-)} e^{ik_0 nd} = \sqrt{\frac{1}{Z_1 Z_{\text{III}}}} \end{array} \right. \quad (21)$$

Additional equations can be obtained from the other case, where the wave propagates from the region of input impedance  $Z_{\text{III}}$  to the region of the output impedance  $Z_1$ . By exchanging  $Z_1$  and  $Z_{\text{III}}$  and  $Z_+$  and  $Z_-$  in (21), we get two additional equations, and together with (21) we achieve the following expressions for  $\exp(ik_0 nd)$ :

$$e^{ik_0 nd} = \sqrt{\frac{Z_1}{Z_{\text{III}}}} \frac{Z_{\text{III}} - Z_+}{Z_1 - Z_+} = \sqrt{\frac{Z_1}{Z_{\text{III}}}} \frac{Z_{\text{III}} + Z_+}{Z_1 + Z_+} = \sqrt{\frac{Z_{\text{III}}}{Z_1}} \frac{Z_1 - Z_-}{Z_{\text{III}} - Z_-} = \sqrt{\frac{Z_{\text{III}}}{Z_1}} \frac{Z_1 + Z_-}{Z_{\text{III}} + Z_-}. \quad (22)$$

It is evident that (22) holds only if  $Z_+ = 0$  and  $Z_- = \infty$  (or if  $Z_+ = \infty$  and  $Z_- = 0$ ). This leads to two sets of solutions  $(n, Z_+, Z_-) = (1/2\log(Z_{\text{III}}/Z_1)/ik_0 d, 0, \infty)$  and  $(1/2\log(Z_1/Z_{\text{III}})/ik_0 d, \infty, 0)$ , which are in fact physically identical in terms of  $(\rho, B^{-1}, \xi) = (2n/(Z_+ + Z_-), 2Z_+ Z_- n/(Z_+ + Z_-), (Z_+ - Z_-)/(Z_+ + Z_-)) = (0, 0, 1/2\log(Z_1/Z_{\text{III}})/k_0 d)$ . It is important to note that when the impedances of the input and output waveguides are identical ( $Z_1 = Z_{\text{III}}$ ), all solutions of  $\rho$ ,  $B^{-1}$  and  $\xi$  should be zero concurrently; enforcing region II to be matched zero index material (for the initial condition of  $R = 0$  and  $T = 1$ ). In contrast, when  $Z_1 \neq Z_{\text{III}}$ , the required bianisotropy  $|\xi|$  increases for larger impedance mismatch  $Z_1/Z_{\text{III}}$ .

The condition for complete transmission between different width waveguides ( $w_1 \neq w_2$ , right of Supplementary Fig. 7) is also obtained by replacing  $Z$  with  $w$ , which leads to the solution  $(\rho, B^{-1}, \xi) = (0, 0, 1/2\log(w_1/w_2)/k_0 d)$ . It is noted that the proposed bianisotropic impedance conversion is intrinsically different from the resonator-based impedance matching<sup>12</sup>, as our condition is determined only by the ratio of impedances ( $Z_{\text{III}}/Z_1$ ), meanwhile the resonator approach involves both the matching of impedances  $(Z_1 Z_{\text{III}})^{1/2}$  and resonance  $n_{\text{eff}} \cdot d = \lambda/4$ .

## Supplementary Note 8. Transmittance of bianisotropic impedance conversion as a function of $\xi$

In this section, we calculate the transmittance for the problem shown in Supplementary Fig. 7 when the wave parameters of the medium in region II are  $(\rho, B^{-1}, \xi) = (0, 0, \xi)$ . For this case, the wave equations in (19) are reduced to

$$\begin{cases} v_{\text{II}} = v_{\text{II}+} e^{k_0 \xi x} \\ p_{\text{II}} = p_{\text{II}-} e^{-k_0 \xi x} \end{cases}, \quad v_{\text{II}}(0) = 1 + R, v_{\text{II}}(d) = \sqrt{\frac{Z_{\text{III}}}{Z_1}} T, \quad p_{\text{II}}(0) = \frac{1-R}{Z_1}, p_{\text{II}}(d) = \sqrt{\frac{1}{Z_1 Z_{\text{III}}}} T. \quad (23)$$

Solving (23) and also replacing  $Z$  with  $w$ , the transmittance  $T$  as a function of  $\xi$  is derived as

$$T = \frac{2}{\sqrt{\frac{Z_{\text{III}}}{Z_1} e^{-k_0 \xi d} + \sqrt{\frac{Z_1}{Z_{\text{III}}}} e^{k_0 \xi d}}} = \frac{2}{\sqrt{\frac{w_2}{w_1} e^{-k_0 \xi d} + \sqrt{\frac{w_1}{w_2}} e^{k_0 \xi d}}}. \quad (24)$$

From (24), the maximum transmittance ( $T = 1$ ) is shown to occur when  $\exp(2k_0 \xi d) = Z_{\text{III}}/Z_1$ , which is equivalent to the primary result obtained in Supplementary Note 7.

## Supplementary Note 9. Determination of $\rho, B^{-1}$ and $\xi$ for the target $\phi_R, \phi_T$

With the target  $S_{11}$  ( $= \sqrt{1/2} \exp(i\phi_R)$ ),  $S_{21}$  ( $= \sqrt{1/2} \exp(i\phi_T)$ ), and  $S_{22}$  ( $= \sqrt{1/2} \exp(i\phi)$ ) for the bianisotropic meta-atom (Supplementary Fig. 8), it is straightforward to calculate  $\rho, B^{-1}$  and  $\xi$ . Adapted from the corresponding solutions in electromagnetic waves<sup>9</sup> we have,

$$n = \frac{\cos^{-1}\left(\frac{1 - S_{11}S_{22} + S_{21}^2}{2S_{21}}\right)}{k_0 d}, \quad \xi = \frac{n \frac{S_{11} - S_{22}}{S_{21}}}{-2 \sin(nk_0 d)}, \quad B^{-1} = \frac{-in}{\sin(nk_0 d)} \left[ \frac{1 + S_{11} + S_{22} + S_{11}S_{22} - S_{21}^2}{2S_{21}} \right], \quad \rho = \frac{n^2 + \xi^2}{B^{-1}}. \quad (25)$$

Assuming the lossless case (i.e.,  $n$  is real or pure imaginary), we obtain real-valued  $\xi$  and  $B^{-1}$  if  $\text{Im}[(S_{11} - S_{22})/S_{21}] = 0$  and  $\text{Re}[(1 + S_{11} + S_{22} + S_{11}S_{22} - S_{21}^2)/2S_{21}] = 0$ . Then we get,

$$\begin{aligned}
\text{Im}\left(\frac{S_{11} - S_{22}}{S_{21}}\right) &= \text{Im}\left(\frac{e^{i\phi_R} - e^{i\phi}}{e^{i\phi_T}}\right) = \sin(\phi_R - \phi_T) - \sin(\phi - \phi_T) = 2 \sin\left(\frac{\phi_R - \phi}{2}\right) \cos\left(\frac{\phi + \phi_R - 2\phi_T}{2}\right) = 0 \\
\text{Re}\left(\frac{1 + S_{11} + S_{22} + S_{11}S_{22} - S_{21}^2}{2S_{21}}\right) &= \frac{1}{2\sqrt{2}}[\cos(\phi_T) + \cos(\phi + \phi_R - \phi_T)] + \frac{1}{2}[\cos(\phi_R - \phi_T) + \cos(\phi - \phi_T)] \\
&= \cos\left(\frac{\phi + \phi_R - 2\phi_T}{2}\right)\left[\cos\left(\frac{\phi_R - \phi}{2}\right) + \frac{1}{\sqrt{2}}\cos\left(\frac{\phi_R + \phi}{2}\right)\right] = 0.
\end{aligned} \tag{26}$$

Both equations in (26) are satisfied when  $\phi = \pi - \phi_R + 2\phi_T$ . Using the target values  $\phi_R$ ,  $\phi_T$ , and  $\phi = \pi - \phi_R + 2\phi_T$  to calculate  $S_{11}$ ,  $S_{21}$ , and  $S_{22}$ , then the required values of  $(\rho, B^{-1}, \xi)$  are determined using (25). Figure 4a in the manuscript and Supplementary Fig. 9 show the phase shift contour  $(\phi_R, \phi_T)$  in the parameter octant space of  $(\rho, B^{-1}, \xi)$  and the maps of each required wave parameters for the decoupled manipulation of the phase shift for  $(\phi_R, \phi_T)$  subject to the constraint of 50:50 power division. For example, Supplementary Fig. 10 shows the required phase shifts  $(\phi_R, \phi_T)$  of an individual meta-atom (in a single sheet of  $40 \times 1$  array) achieving ordinary ( $\Delta\phi(x) = 0$ , blue marks) or extra-ordinary ( $\Delta\phi(x) \neq 0$ , red marks) reflection and transmission. From the target  $(\phi_R, \phi_T)$  values in Supplementary Fig. 10, the calculation of  $(\rho, B^{-1}, \xi)$  are obtained from Eqs. (25); then, the top-down determination of the corresponding  $(t_0, t_1, \Delta t_1)$  is straightforward.

## Supplementary References

1. Cummer, S. A. & Schurig, D. One Path to acoustic cloaking. *New J. of Phys.* **9**, 45 (2007).
2. Timoshenko, S. & Woinowsky-Krieger, S. *Theory of plates and shells* (McGraw-Hill, New York, 1989).
3. Alù, A. First-principles homogenization theory for periodic metamaterials. *Phys. Rev. B* **84**, 075153 (2011).
4. Smith, D. R., Vier, D. C., Koschny, T. & Soukoulis, C. M. Electromagnetic parameter retrieval from inhomogeneous metamaterials. *Phys. Rev. E* **71**, 036617 (2005).
5. Silveirinha, M. G. Metamaterial homogenization approach with application to the characterization of microstructured composites with negative parameters. *Phys. Rev. B* **75**, 115104 (2007).

6. Liu, F., Huang, X. & Chan, C. T. Dirac cones at  $k = 0$  in acoustic crystals and zero refractive index acoustic materials. *Appl. Phys. Lett.* **100**, 071911 (2012).
7. Huang X. *et al.* Dirac cones induced by accidental degeneracy in photonic crystals and zero-refractive-index materials. *Nat. Materials* **10**, 582-586 (2011).
8. Kinsler, L. E., Frey, A. R., Coppens, A. B., and Sanders, J. V. *Fundamental of acoustics* (John Wiley & Sons, 1999, USA).
9. Li., Z., Aydin, K. & Ozbay, E. Determination of the effective constitutive parameters of bianisotropic metamaterials from reflection and transmission coefficients. *Phys Rev. E* **79**, 026610 (2009).
10. Saadoun, M. M. I. & Engheta, N. A reciprocal phase shifter using novel pseudo-chiral or  $\omega$  medium. *Microw. Opt. Technol. Lett.* **5**, 184-188 (1992).
11. Mackay, T. G. & Lakhtakia, A. *Electromagnetic anisotropy and bianisotropy: A field guide* (World Scientific, Singapore, 2010).
12. Cheng, D. K. *Field and wave electromagnetics* (Addison Wesley, USA, 1989).
